# Supplementary material for: An opioid-gated thalamoaccumbal circuit for the suppression of reward seeking in mice
Source: PubMed Central journal article supplement (PMC9652456; doi:10.1038/s41467-022-34517-w), 2022-11-11
Supplement: 41467_2022_34517_MOESM1_ESM.pdf [file 41467_2022_34517_MOESM1_ESM.pdf]

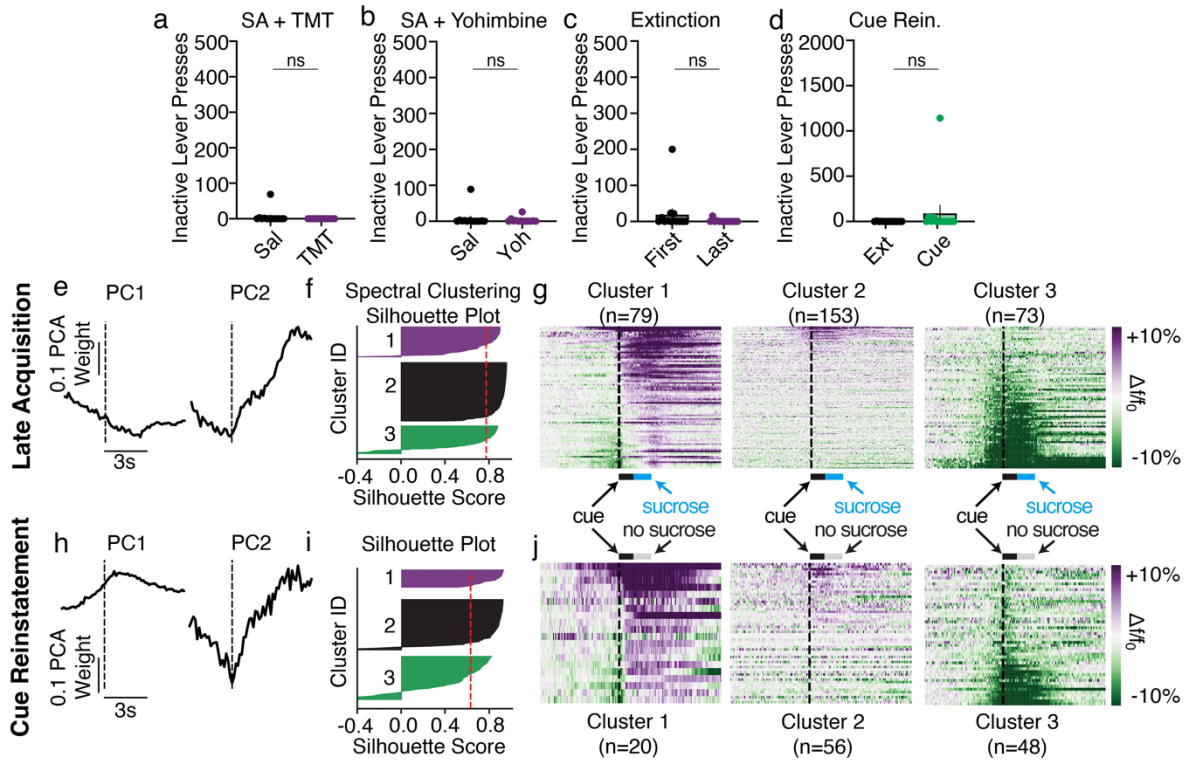

**Supplementary Figure 1. Inactive lever responding for *in vivo* imaging, PCA-based spectral clustering silhouette scores and within-cluster response dynamics.**

**a-d**, Inactive lever pressing remained unchanged after TMT exposure (**a**;  $n=13$  mice; two-tailed t-test,  $t_{12}=1.08$ ,  $P=0.30$ ), yohimbine administration (**b**;  $n=13$  mice; two-tailed t-test,  $t_{12}=0.63$ ,  $P=0.54$ ), extinction learning (**c**;  $n=13$  mice; two-tailed t-test,  $t_{12}=1.32$ ,  $P=0.21$ ) and cue-induced reinstatement (**d**;  $n=13$  mice; two-tailed t-test,  $t_{12}=1.09$ ,  $P=0.29$ ; data are presented as mean values  $\pm$  SEM). **e, f**, Principal components analysis (**e**) and silhouette plot (**f**) show the relative fit for each neuron for each cluster formed by spectral clustering during late acquisition. **g**, Heatmaps for each neuronal ensemble reveals within-cluster neuronal responses during an active lever press for sucrose. **h, i**, Principal components analysis (**h**) and silhouette plot (**i**) show the relative fit for each neuron for each cluster during cue reinstatement. **j**, Heatmaps for each neuronal ensemble during an active lever press, with no sucrose reward. Rein., Reinstatement. Source data are provided as a Source Data file.

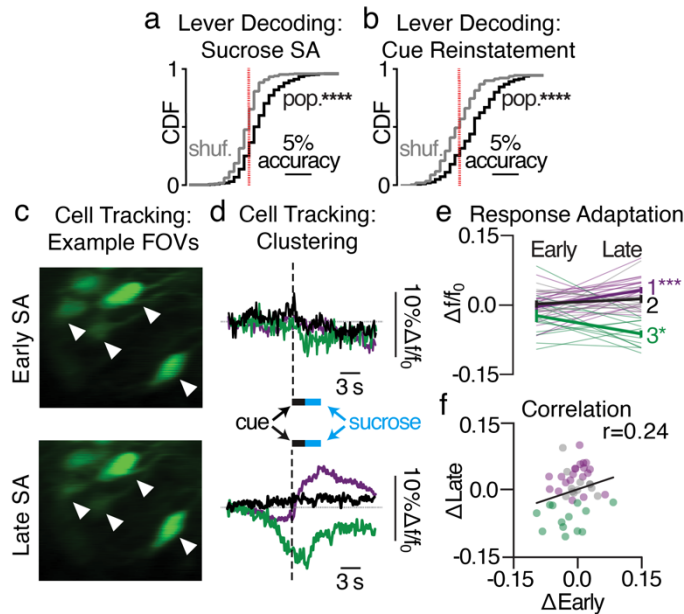

**Supplementary Figure 2. Decoding reveals that PVT→NAC population dynamics predict active lever pressing, while cell tracking shows PVT→NAC clusters adapt across learning.**

**a**, CDF plot showing that the activity of all PVT→NAC neurons, not split by cluster, can predict active lever pressing during late acquisition (two-tailed t-test,  $t_{304}=9.30$ , \*\*\*\* $P<0.001$ ). **b**, CDF plot showing all PVT→NAC neurons, not split by cluster, can predict active lever pressing during cue reinstatement (two-tailed t-test,  $t_{123}=5.85$ , \*\*\*\* $P<0.001$ ). **c**, Example FOVs for PVT→NAC neurons which were tracked across sucrose self-administration days ( $n=6$  mice, 45 tracked cells); early acquisition day (top), late acquisition day (bottom). **d**, Clustering of the tracked cells across each day revealed a change in ensemble dynamics for excitatory responders (20 cells), non-responders (12 cells), and inhibitory responders (13 cells). **e**, Mean responses for all tracked cells show a significant response adaptation for ensembles 1 and 3 across early and late acquisition days (two-way ANOVA, ensemble x time interaction:  $F_{2,84}=10.08$ ;  $P<0.001$ ; Sidak's post-hoc: ensembles 1, 3  $P$ -values $<0.02$ ). **f**, Correlation plot displaying mean responses (early vs. late) for all tracked neurons (Pearson-R value displayed in top right of graph,  $P=0.12$ ). SA, self-administration; shuf., shuffled data; pop., population data; FOV, field of view. Group comparisons: \* $P<0.05$ , \*\*\* $P=0.001$ , \*\*\*\* $P<0.001$ .

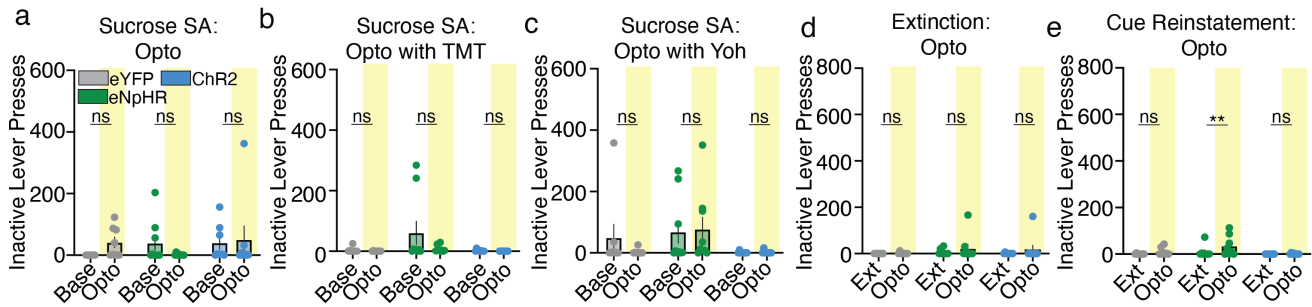

**Supplementary Figure 3. Inactive lever pressing was unchanged by optogenetic manipulation of PVT→NAC neurons.**

**a-e**, Inactive lever pressing remained unchanged despite optogenetic manipulation of PVT→NAC neurons for opto (**a**;  $n=8$  eYFP, 8 eNpHR, 9 ChR2 mice; repeated-measures two-way ANOVA,  $F$ -values $<1.37$ ,  $P$ -values $>0.28$ ), TMT (**b**;  $n=8$  eYFP, 9 eNpHR, 9 ChR2 mice; repeated-measures two-way ANOVA,  $F$ -values $<2.82$ ,  $P$ -values $>0.08$ ), yohimbine (**c**;  $n=8$  eYFP, 9 eNpHR, 8 ChR2 mice; repeated-measures two-way ANOVA, group:  $F_{2,22}=3.93$ ,  $P=0.04$ ; post-hoc:  $P$ -values $>0.71$ ), and extinction (**d**;  $n=8$  eYFP, 9 eNpHR, 9 ChR2 mice; repeated-measures two-way ANOVA,  $F$ -values $<1.68$ ,  $P$ -values $>0.21$ ). **e**, Optogenetic inhibition of PVT→NAC neurons in eNpHR mice resulted in an increase of inactive lever pressing during cue-reinstatement, though other groups were unchanged ( $n=8$  eYFP, 8 eNpHR, 9 ChR2 mice; repeated-measures two-way ANOVA, day:  $F_{1,22}=9.23$ ,  $P=0.006$ ; post-hoc: eNpHR  $**P=0.004$ ). SA, self-administration; Base, baseline; Opto, optogenetics; Yoh, yohimbine. Data are presented as mean values  $\pm$  SEM. Source data are provided as a Source Data file.

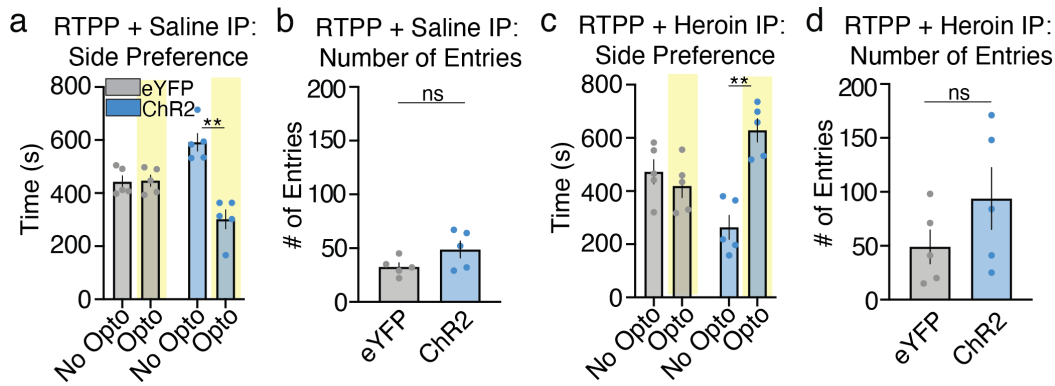

**Supplementary Figure 4. Heroin administration causes stimulation of PVT→NAc neurons to be appetitive, rather than aversive.**

**a**, Optogenetic stimulation of PVT→NAc neurons resulted in a real-time place aversion in ChR2 mice, but not eYFP mice ( $n=5$  mice/group; repeated-measures two-way ANOVA, side x group:  $F_{1,8}=12.89$ ,  $P=0.007$ ; post-hoc: ChR2  $**P=0.002$ , eYFP  $P=0.99$ ). **b**, Optogenetic stimulation of PVT→NAc neurons did not affect locomotion, as there was not a significant difference in the number of chamber entries between eYFP and ChR2 mice ( $n=5$  mice/group; two-tailed t-test,  $t_4=2.59$ ;  $P=0.06$ ). **c**, A single intraperitoneal injection of heroin resulted in stimulation-dependent real-time place preference in ChR2 mice, but not eYFP mice ( $n=5$  mice/group; repeated-measures two-way ANOVA, side x group:  $F_{1,8}=10.85$ ,  $P=0.01$ ; post-hoc: ChR2  $**P=0.007$ , eYFP  $P=0.82$ ). **d**, Optogenetic stimulation of PVT→NAc neurons did not affect locomotion in heroin-treated mice, as there was not a significant difference in the number of chamber entries between eYFP and ChR2 mice ( $n=5$  mice/group; two-tailed t-test,  $t_4=2.59$ ;  $P=0.06$ ). RTTPP, real-time place preference; IP, intraperitoneal injection; Opto, optogenetics. Data are presented as mean values +/- SEM. Source data are provided as a Source Data file.

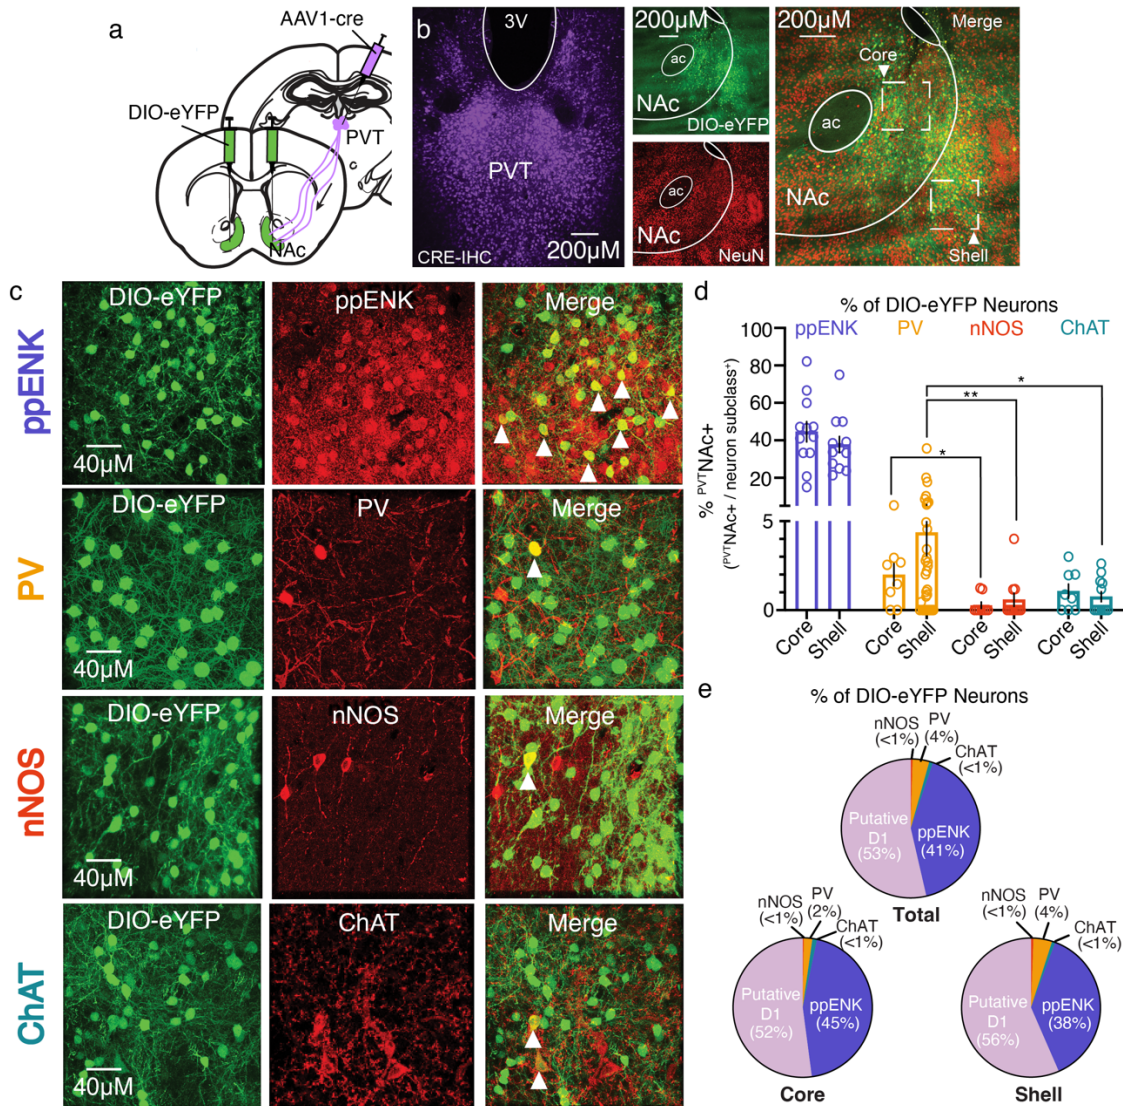

**Supplementary Figure 5. Identification of downstream PVT projection targets reveals synaptic innervation of D1-MSNs, D2-MSNs, and PV interneurons.**

**a**, Surgical strategy wherein the anterogradely trafficked virus AAV1-Cre<sup>27</sup> was used to label downstream cellular targets of PVT→NAc projection neurons. **b**, Example immunohistochemistry (IHC) for Cre, showing viral transduction of AAV1-Cre in posterior PVT (left); representative images of DIO-eYFP labeling and NeuN IHC in NAc core and shell (middle); merged image of Cre-inducible eYFP and NeuN in NAc (right). **c**, Representative images showing anterogradely labeled eYFP<sup>+</sup> neurons (left; neurons receiving strong PVT input), IHC for ppENK (putative D2 MSNs), PV, nNOS, and ChAT (middle), and overlaid images (right). **d**, Percentage of co-labeled eYFP<sup>+</sup> and neuron subclass markers in neurons of the NAc core versus shell. Anterograde PV interneuron labeling was elevated compared to other striatal interneurons in NAc shell ( $n=3$  mice, 68 cells; one-way ANOVA, effect of cell type:  $F_{3,64}=61.39$ ,  $P<0.001$ ; Sidak's post-hoc: PV vs nNOS  $**P=0.008$ ; PV vs ChAT  $*P=0.01$ ), but only greater than one striatal interneuron subtype in NAc core ( $n=3$  mice, 37 cells; one-way ANOVA, effect of cell type:  $F_{3,33}=41.42$ ,  $P<0.001$ ; Sidak's post-hoc: PV vs nNOS  $*P=0.03$ ; PV vs ChAT  $P=0.28$ ). **e**, Pie-charts displaying a comparison of eYFP<sup>+</sup>/neuron subclass labeled markers in NAc core and shell; putative D1, D2-MSNs, and PV-interneurons had elevated anterograde labeling, suggesting strong synaptic connections with PVT. Data are presented as mean values  $\pm$  SEM.



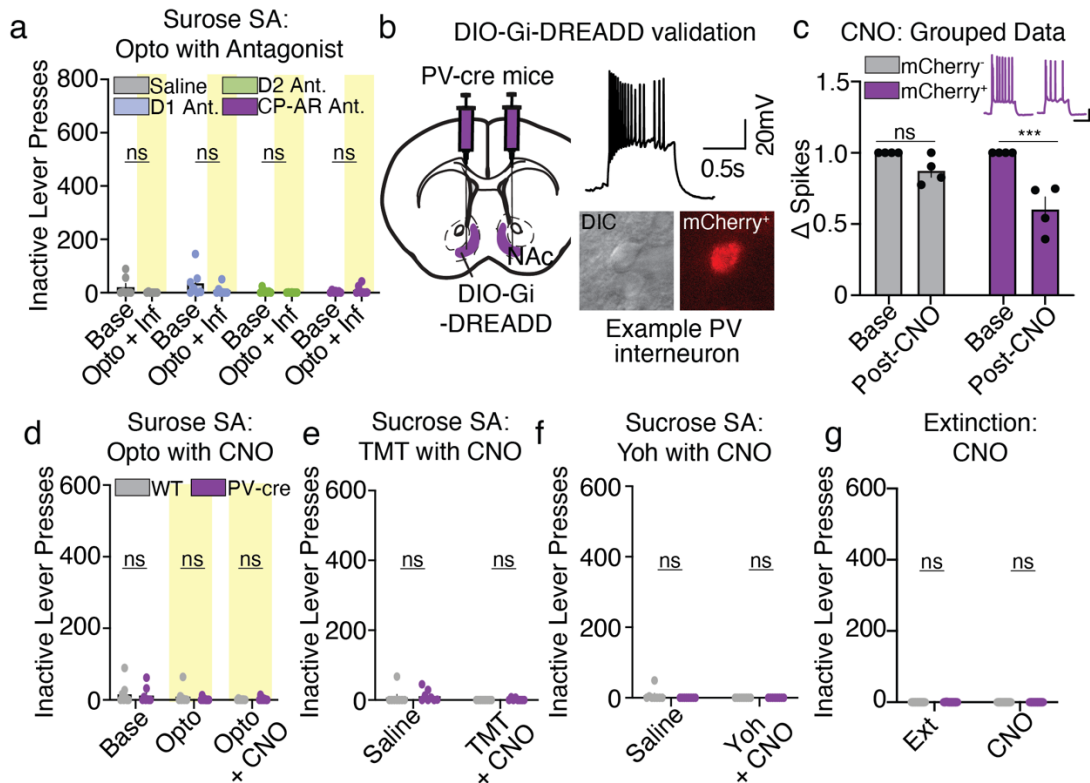

**Supplementary Figure 6. Selective DREADD-mediated inhibition of PV-interneurons, and inactive lever responding during pharmacological and chemogenetic manipulations.**

**a**, Inactive lever pressing remained unchanged despite optogenetic activation of PVT→NAc neurons with or without intra-NAc infusions of antagonists for D1 receptors, D2 receptors, and CP-AMPA receptors ( $n=7$  mice/group; repeated-measures two-way ANOVA,  $F$ -values < 3.61,  $P$ -values > 0.07). **b**, Viral strategy (left) and example PV interneuron (right) waveform and expression. **c**, Waveforms (scale: 20mV/0.5s) and grouped data ( $n=4$  cells, 2-4 mice/group) revealed that mCherry<sup>+</sup> neurons spiked significantly less than neighboring mCherry<sup>-</sup> neurons following bath application of CNO (repeated-measures two-way ANOVA, time x group interaction:  $F_{1,12}=7.68$ ,  $P<0.01$ ; Sidak's post-hoc: mCherry<sup>+</sup> \*\*\* $P=0.0002$ ). **d-g**, Inactive lever pressing remained unchanged despite optogenetic manipulation of PVT→NAc neurons with or without chemogenetic inhibition of PV interneurons through intra-NAc infusions of CNO (**d**, Opto:  $n=8$  mice/group;  $F$ -values < 2.33,  $P$ -values > 0.13; **e**, TMT:  $n=8$  mice/group; repeated-measures two-way ANOVA,  $F$ -values < 3.19,  $P$ -values > 0.09; **f**, yohimbine:  $n=8$  mice/group; repeated-measures two-way ANOVA,  $F$ -values < 1.19,  $P$ -values > 0.29; **g**, extinction:  $n=7$  mice/group; repeated-measures two-way ANOVA,  $F$ -values < 2.29,  $P$ -values > 0.12). SA, self-administration; Base, baseline; Opto, optogenetics; Inf, infusion; Ant., antagonist; Yoh, yohimbine; Ext, extinction. Bar graphs are presented as mean values  $\pm$  SEM. Source data are provided as a Source Data file.

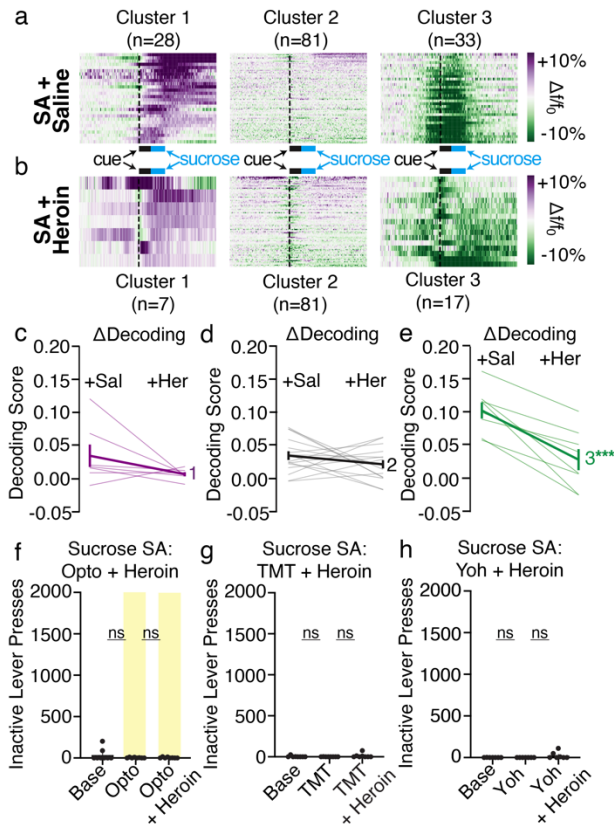

**Supplementary Figure 7. Heroin administration modulates PVT-NAc neuronal ensemble dynamics, but not inactive lever pressing.**

**a-b**, Heatmaps for each neuronal ensemble during sucrose self-administration following an intraperitoneal injection of saline (**a**;  $n=142$  cells/4 mice) or heroin (**b**;  $n=105$  cells/4 mice). **c-e**, Decoding scores for tracked cells in ensemble #1 (**c**), #2 (**d**), and #3 (**e**), show that heroin significantly reduces decoding for inhibited ensemble #3 (two-tailed t-test,  $t_7=5.89$ ,  $P=0.001$ ), but not other ensembles (two-tailed t-tests,  $t$ -scores $<1.6$ ,  $P$ -values $>0.15$ ). **f-h**, Inactive lever pressing remained unchanged across all conditions with or without a simultaneous systemic injection of heroin (**f**, Opto:  $n=8$  mice/group; one-way ANOVA,  $F_{2,21}=1.59$ ,  $P=0.23$ ; **g**, TMT:  $n=8$  mice/group; one-way ANOVA,  $F_{2,21}=1.22$ ,  $P=0.32$ ; **h**, yohimbine:  $n=7$  mice/group; one-way ANOVA,  $F_{2,18}=2.25$ ,  $P=0.13$ ). SA, self-administration; Base, baseline; Opto, optogenetics, Yoh, yohimbine. Bar and line graphs are presented as mean values  $\pm$  SEM. Source data are provided as a Source Data file.

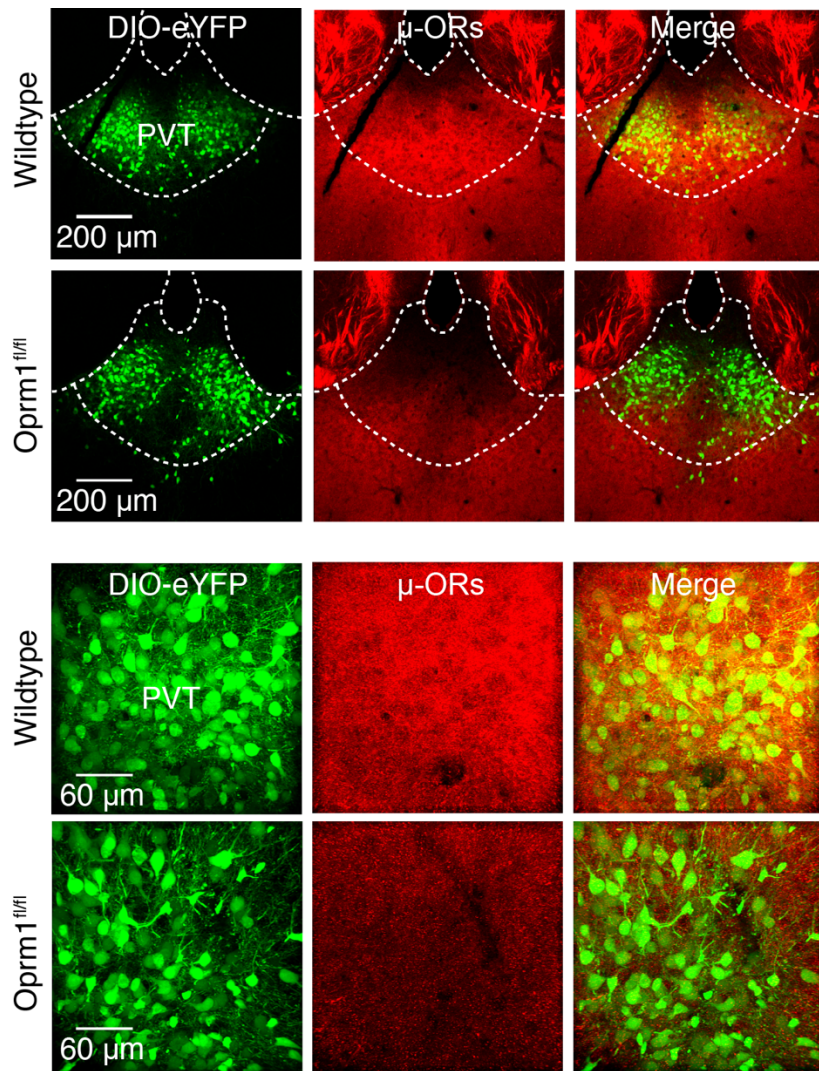

**Supplementary Figure 8. Immunohistochemistry of PVT→NAc  $\mu$ -opioid receptor expression in WT and *Oprm1<sup>fl/fl</sup>* mice.**

Zoomed-out (top rows) and zoomed-in (bottom rows) images of PVT→NAc  $\mu$ -OR expression in WT and *Oprm1<sup>fl/fl</sup>* mice following Cre-dependent knockout.



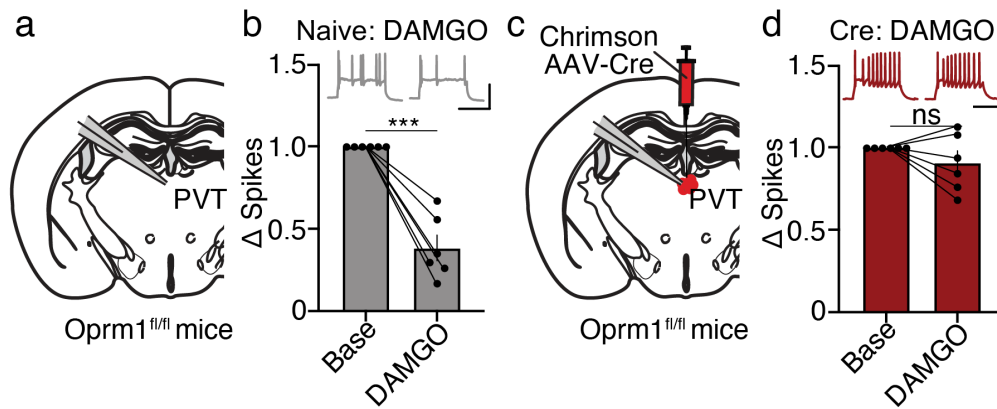

**Supplementary Figure 9. DAMGO-induced suppression of PVT firing rates is prevented by knockout of PVT  $\mu$ -opioid receptors.**

**a**, Electrophysiological strategy for recording PVT neurons in naïve *Oprm1<sup>fl/fl</sup>* mice. **b**, Example waveforms (scale: 50mV/0.5s) and grouped data from patched PVT neurons show a decrease in spiking following DAMGO ( $n=6$  cells, 2 mice; two-tailed t-test,  $t_5=7.89$ ,  $P=0.001$ ). **c**, Viral strategy for Cre-dependent knockout of PVT  $\mu$ -ORs in *Oprm1<sup>fl/fl</sup>* mice. **d**, Example waveforms (scale: 50mV/0.5s) and grouped data show knockout of PVT  $\mu$ -ORs prevents DAMGO-induced decrease of spiking ( $n=6$  cells, 4 mice; two-tailed t-test,  $t_5=1.29$ ,  $P=0.26$ ).  $\mu$ -OR,  $\mu$ -opioid receptor; Base, Baseline. Bar graphs are presented as mean values  $\pm$  SEM. Source data are provided as a Source Data file.

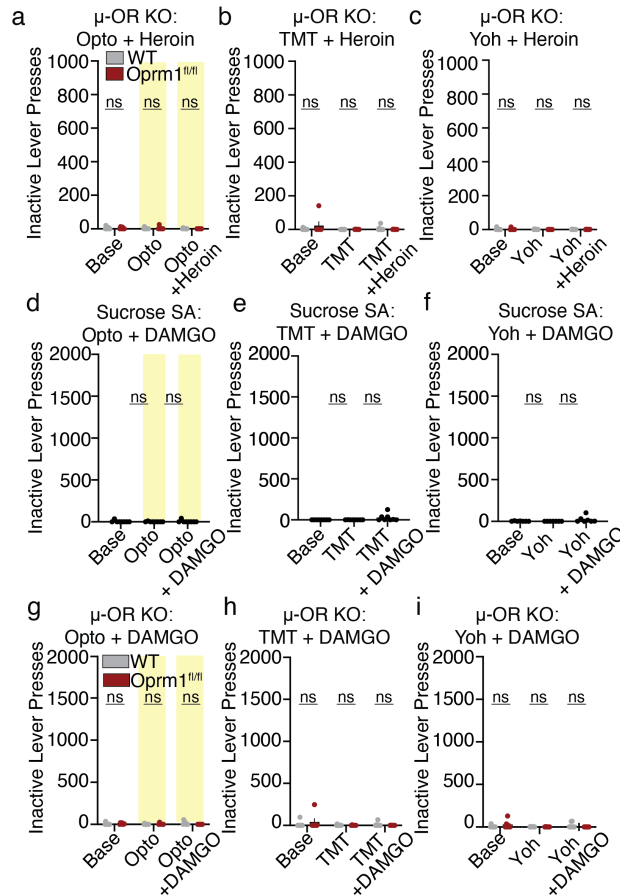

**Supplementary Figure 10. Inactive lever pressing remains low after intraperitoneal heroin injection or intracranial DAMGO infusion in WT and *Oprm1<sup>fl/fl</sup>* mice.**

**a-c**, Inactive lever pressing remained unchanged across all conditions and groups with or without a simultaneous systemic injection of heroin (**a**,  $\mu$ -OR KO Opto:  $n=6$  *Oprm1<sup>fl/fl</sup>*, 8 WT mice; repeated-measures two-way ANOVA,  $F_{2,24}=0.54$ ,  $P=0.59$ ; **b**,  $\mu$ -OR KO TMT:  $n=6$  *Oprm1<sup>fl/fl</sup>*, 8 WT mice; repeated-measures two-way ANOVA,  $F_{2,24}=1.35$ ,  $P=0.28$ ; **c**,  $\mu$ -OR KO yohimbine:  $n=6$  *Oprm1<sup>fl/fl</sup>*, 8 WT mice; repeated-measures two-way ANOVA,  $F_{2,24}=0.15$ ,  $P=0.86$ ). **d-i**, Inactive lever pressing remained unchanged across all conditions and groups with or without an intra-NAC infusion of DAMGO (**d**, Opto:  $n=8$  mice/group; one-way ANOVA,  $F_{2,21}=0.32$ ,  $P=0.73$ ; **e**, TMT:  $n=8$  mice/group; one-way ANOVA,  $F_{2,21}=2.83$ ,  $P=0.08$ ; **f**, yohimbine:  $n=8$  mice/group; one-way ANOVA,  $F_{2,18}=2.09$ ,  $P=0.15$ ; **g**,  $\mu$ -OR KO Opto:  $n=6$  *Oprm1<sup>fl/fl</sup>*, 8 WT mice; repeated-measures two-way ANOVA,  $F_{2,24}=1.62$ ,  $P=0.23$ ; **h**,  $\mu$ -OR KO TMT:  $n=6$  *Oprm1<sup>fl/fl</sup>*, 8 WT mice; repeated-measures two-way ANOVA,  $F_{2,24}=0.82$ ,  $P=0.45$ ; **i**,  $\mu$ -OR KO yohimbine:  $n=6$  *Oprm1<sup>fl/fl</sup>*, 8 WT mice; repeated-measures two-way ANOVA,  $F_{2,24}=2.63$ ,  $P=0.09$ ).  $\mu$ -OR,  $\mu$ -opioid receptor; KO, knockout; WT, wild-type; Yoh, yohimbine; SA, self-administration. Bar graphs are presented as mean values  $\pm$  SEM. Source data are provided as a Source Data file.

**Supplementary Table 1. Primary resources for immunohistochemistry.**

| <b>Primary antisera</b>   | <b>Host species</b> | <b>Concentration</b> | <b>Source</b>        | <b>RRID (AB_)</b> | <b>Immunogen</b>                      | <b>Secondary antisera</b> |
|---------------------------|---------------------|----------------------|----------------------|-------------------|---------------------------------------|---------------------------|
| Choline acetyltransferase | Mouse               | 1:1000               | Millipore, AMAB91130 | 2665812           | Peptide sequence                      | Anti-mouse 647            |
| Parvalbumin               | Mouse               | 1:1000               | Millipore, MAB1572   | 2174013           | Parvalbumin purified from frog muscle | Anti-mouse 647            |
| Pre-pro Enkephalin        | Rabbit              | 1:200                | Neuromics, RA14124   | 2532106           | Peptide sequence                      | Anti-rabbit 647           |
| nNOS                      | Rabbit              | 1:1000               | Millipore, AB5380    | 91824             | Recombinant human nNOS                | Anti-rabbit 647           |
| $\mu$ -Opioid Receptor    | Rabbit              | 1:500                | Abcam, AB134054      | N/A               | Peptide sequence                      | Anti-rabbit 647           |
| NeuN                      | Mouse               | 1:1000               | Millipore, MAB377    | 2298772           | Purified cell nuclei                  | Anti-mouse 647            |
| Cre                       | Mouse               | 1:1000               | Millipore MAB3120    | 2085748           | Cre-recombinase fusion protein        | Anti-mouse 647            |
